# Supplementary material for: Chromatin interaction maps identify Wnt responsive cis-regulatory elements coordinating Paupar-Pax6 expression in neuronal cells
Source: PLoS Genet. 2022 Jun 16;18(6):e1010230. doi: 10.1371/journal.pgen.1010230 (PMC9202886; doi:10.1371/journal.pgen.1010230)
Supplement: S9 Table — (XLSX) [file pgen.1010230.s012.xlsx]

## Sheet: S9 Table
S9 Table: Numerical data used to generate individual figures
Fig 1
Paupar
Rel expression
	ESC	N2A	NSC	Neu
	4.67024e-07	3.66692e-06	1.80205e-05	2.2652e-05
	6.7435e-07	2.95175e-06	2.34509e-05	2.18804e-05
	5.14616e-07	2.58752e-06	1.32835e-05	2.65671e-05
	4.80154e-07	3.12005e-06	2.80819e-05	4.92335e-05
	1.17411e-06	1.1905e-06	2.63836e-05	3.22576e-05
	3.04285e-08	1.4256e-06	3.22576e-05	6.14597e-05
Mean	5.5678e-07	2.49039e-06	2.35797e-05	3.56751e-05
sem	1.51401e-07	4.01101e-07	2.83061e-06	6.59091e-06
Pax6 P0
Rel expression
	ESC	N2A	NSC	Neu
	6.6329e-05	3.92719e-07	0.000135445	0.00041345
	6.77227e-05	1.46568e-06	0.000138291	0.000393868
	6.81938e-05	1.5928e-06	0.000239116	0.000335826
	0.000131742	1.17411e-06	0.000526967	0.000990195
	8.39564e-05	3.16783e-07	0.000592869	0.00112958
	7.10897e-05	1.53855e-06	0.000930311	0.00170029
mean	8.15056e-05	1.08011e-06	0.000427167	0.000827202
sem	1.03854e-05	2.37044e-07	0.000128385	0.000222164
Pax6 P1
Rel expression
	ESC	N2A	NSC	Neu
	0.00427458	0.00723897	0.0330318	0.0344345
	0.00451831	0.00608722	0.0374212	0.0279695
	0.00421574	0.00529924	0.0818996	0.0376815
	0.00497875	0.0099575	0.0366511	0.0361465
	0.00529924	0.00975258	0.0382075	0.0314674
	0.00560139	0.00942037	0.0435857	0.0310341
mean	0.00481467	0.00795931	0.0451328	0.0331223
sem	0.0002323	0.000825488	0.0074833	0.0014754
Fig 3A and 3B
Target	Exp1	Exp2	Exp3		Mean	sem
Cont	1	1	1	1	1
Klf16	0.521233	0.44227	0.828745		0.597416	0.117889
Sox6	0.595016	0.460094	0.410086		0.488399	0.0552286
Arid3a	0.286578	0.395021	0.249827		0.310475	0.0435837
Tcf7l2	0.172181	0.284993	0.260616	0.227667	0.236365	0.0244064
Ascl1	0.670821	0.51477	0.712519		0.632703	0.0601827
Paupar
esiRNAcont	1	1	1	1	1
Klf16	1.43594	1.33237	1.63354		1.46729	0.0883393
Sox6	2.91198	1.82008	1.89605		2.20937	0.351988
Arid3a	3.17114	1.91853	1.51362		2.20109	0.498907
Tcf7l2	0.68968	0.53	0.28	0.601652	0.525333	0.0880552
Ascl1	0.466193	0.787308	0.714002		0.655834	0.0971533
Pax6
esiRNAcont	1	1	1	1	1
Klf16	1.16231	0.78187	1.54221		1.16213	0.219492
Sox6	1.29954	1.00696	1.34443		1.21698	0.105807
Arid3a	1.34257	1.26927	1.03383		1.21522	0.0931327
Tcf7l2	0.775931	0.755236	0.89	0.792784	0.803488	0.029842
Ascl1	0.926588	0.937571	0.92889		0.931016	0.00334404
Fig 3C
BcatS33Y
Target	Exp1	Exp2	Exp3	Average	sem
Paupar	0.544876	0.543744	0.666649	0.58509	0.040781
Pax6	0.620714	0.573554	0.588046	0.594104	0.013947
Tcf7l2	0.301317	0.216724		0.25902	0.0422965
Empty vector
Paupar	1	1	1	1
Pax6	1	1	1	1
Tcf7l2	1	1		1
Fig 3D
	Paupar			Pax6			Tcf7L2
	Control	Wnt3a		Control	Wnt3a		Control	Wnt3a
	1	0.659754		1	0.641713		1	0.460094
	1	0.692555		1	0.554785		1	0.590496
	1	0.291183		1	0.543367		1	0.558644
	1	0.283221		1	0.784584		1	0.920188
	1	0.257028		1	0.747425		1	0.876606
Mean	1	0.436748		1	0.528509		1	0.61132
sem	0	0.0980376		1	0.633397		1	0.669558
Fig 3E
	Paupar			Pax6			Tcf7L2
	Control	Bmp4		Control	Bmp4		Control	Bmp4
	1	1.89212		1	1.93187		1	2.67586
	1	3.605		1	2.78949		1	2.90795
	1	3.97237		1	2.58471		1	2.56685
	1	0.870551		1	1.45397		1	1.95884
	1	1.11729		1	1.48452		1	2.01391
	1	1.32869		1	1.11729		1	1.94531
Mean	1	2.131		1	1.89364		1	2.34479
sem	0	0.544072		0	0.273556		0	0.172635
Fig 3F
		Paupar			Pax6			Tcf7L2
	Control	Rspo2		Control	Rspo2		Control	Rspo2
	1	1.28343		1	0.80107		1	1.20581
	1	2.28153		1	1.02811		1	1.21419
	1	1.79005		1	0.747425		1	0.870551
	1	0.514057		1	1.10191		1	0.543367
	1	0.697372		1	1.33793		1	0.757858
	1	1.02101		1	0.732043		1	0.965936
Mean	1	1.26457		1	0.958081		1	0.926286
sem	0	0.274165		0	0.0983184		0	0.106567
Fig 4B
	R1	R2	R3	Enrichment	sem
CRE1	1.67	2.56685	2.65737	2.29807	0.315123
CRE2	5.26585	4.22807	2.3511	3.94834	0.852963
CRE3	26.3549	17.1682	17.2079	20.2437	3.05564
CRE4	0.926588	1.09429	1.02101	1.01396	0.0485405
	1.04247	0.624165	22.7848
CRE5	42.8137	1.23114	1.21419	11.2459	5.23694
	0.90125	27.2843	3.31728
CRE6	0.793701	0.323088	0.040761	0.38585	0.219609
CRE7	1.28046	0.89296		1.08671	0.193752
Cont1	0.825496	1.56917	1.85746	1.41738	0.307419
Cont2	1.04006	2.85469	0.321599	1.40545	0.753717
IgG	1	1	1	1	0
Fig 4C
sgCRE1	Neg	Paupar	Neg	Pax6		sgContA	Neg	Paupar	Neg	Pax6		sgContB	Neg	Paupar	Neg	Pax6
Motif1	1	0.071293	1	0.211258			1	0.546117	1	0.512789			1	0.221961	1	0.530742
	1	0.129024	1	0.222494			1	0.647634	1	0.573366			1	0.234389	1	0.539874
	1	0.194767	1	0.216055			1	0.340239	1	0.573962			1	0.178286	1	0.508179
	1	0.661718	1	1.18033			1	1.06603	1	0.588098			1	1.78	1	1.23621
	1	0.765915	1	1.26689			1	0.791558	1	0.575748			1	2.11812	1	1.24372
	1	0.752074	1	1.41327			1	0.909005	1	0.628547			1	2.29177	1	1.26685
	1	2.12944	1	1.31483			1	1.38409	1	1.25009			1	0.300649	1	0.37515
	1	1.39323	1	1.30019			1	1.08242	1	1.12381			1	0.236564	1	0.335768
	1	1.59286	1	1.29074			1	1.14782	1	0.913149			1		1	0.371502
Mean	1	0.85448	1	0.935117		Mean	1	0.879435	1	0.74884		Mean		0.920218	1	0.711999
sem	0	0.238379	0	0.180724		sem		0.109727		0.0917585		sem		0.338457		0.136441
										Paupar	sem
sg Cont	1	1	1	1	1	1	1	1	1	1
sg CRE2	1.89212	1.33793	1.54756	1.87905	1.41421	1.64718	2.92817	2.14355	3.70635	2.05512	0.260963
										Pax6	sem
sg Cont	1	1	1	1	1	1	1	1	1	1
sg CRE2	1.55833	1.43396	1.31951	1.48452	1.30134	0.946058	1.58008	1.31951	1.21419	1.35083	0.0653322
							Paupar	sem
sg Cont	1	1	1	1	1	1	1
sg CRE3	0.870551	0.664343	0.768438	0.993092	0.68302	0.655197	0.77244	0.0451556
										Pax6	sem
sg Cont	1	1	1	1	1	1	1	1	1	1
sg CRE3	0.812252	0.895025	0.641713	0.812252	0.870551	0.463294	0.607097	0.687771	0.50698	0.699659	0.0524122
										Paupar	sem
sg Cont	1	1	1	1	1	1	1	1	1	1
sg CRE-5	1.18921	1.02811	1.04972	4	1.77769	2.71321	2.77022	1.6358	1.41421	1.95313	0.335665
										Pax6	sem
sg Cont	1	1	1	1	1	1	1	1	1	1
sg CRE-5	1.22264	1.3566	1	1.89212	1.37554	1.79005	2.09943	1.89212	1.30134	1.54776	0.125437
Fig 4D
	Exp1	Exp2	Exp3	Exp4	Mean
UAS-Pax6 Pro	1	1	1	1	1
Gal4-MCP	1.11513	0.847493	1.10068	1.00751	1.0177
Gal4-MCP MS2-Paupar	1.81251	1.6722	1.43128	1.36805	1.57101
MS2Paupar	1.37578	0.979237	1.16787	1.27505	1.19948
